# Supplementary material
Source: PubMed Central journal article supplement (PMC4609002)
Supplement: supp_btu392_supplement.pdf [file supp_btu392_supplement.pdf]

## SUPPLEMENTARY DATA

**Table S1.** Smith-Waterman scoring parameter applied for Illumina-PacBio hybrid alignments

|                  | default | proofread<br>refined | SHRiMP2<br>default |
|------------------|---------|----------------------|--------------------|
| match            | 5       | 5                    | 10                 |
| mismatch         | -11     | -10                  | -15                |
| gap-open on LR   | -2      | -5                   | -33                |
| gap-open on SR   | -1      | -5                   | -33                |
| gap-extend on LR | -4      | -2                   | -7                 |
| gap-extend on SR | -3      | -2                   | -3                 |

## SHANNON-ENTROPY

$$H(X) = - \sum_{i=1}^n p(x_i) \log_b p(x_i) \quad (\text{S1})$$

## PHRED CONVERSION

$$p = \min(\sqrt{f \cdot 50}, 40); \quad (\text{S2})$$

**Table S2.** Frequency to Phred conversion table

| Freq. | Phred | ASCII<br>Phred+64 | Freq. | Phred | ASCII<br>Phred+64 |
|-------|-------|-------------------|-------|-------|-------------------|
| 0     | 0     | @                 | 20    | 32    | `                 |
| 1     | 7     | G                 | 21    | 32    | `                 |
| 2     | 10    | J                 | 22    | 33    | a                 |
| 3     | 12    | L                 | 23    | 34    | b                 |
| 4     | 14    | N                 | 24    | 35    | c                 |
| 5     | 16    | P                 | 25    | 35    | c                 |
| 6     | 17    | Q                 | 26    | 36    | d                 |
| 7     | 19    | S                 | 27    | 37    | e                 |
| 8     | 20    | T                 | 28    | 37    | e                 |
| 9     | 21    | U                 | 29    | 38    | f                 |
| 10    | 22    | V                 | 30    | 39    | g                 |
| 11    | 23    | W                 | 31    | 39    | g                 |
| 12    | 24    | X                 | 32    | 40    | h                 |
| 13    | 25    | Y                 | 33    | 40    | h                 |
| 14    | 26    | Z                 | 34    | 40    | h                 |
| 15    | 27    | [                 | 35    | 40    | h                 |
| 16    | 28    | \                 | 36    | 40    | h                 |
| 17    | 29    | ]                 | 37    | 40    | h                 |
| 18    | 30    | ^                 | 38    | 40    | h                 |
| 19    | 31    | _                 | 39    | 40    | h                 |
| 20    | 32    | `                 | 40    | 40    | h                 |

## Package size vs. accuracy

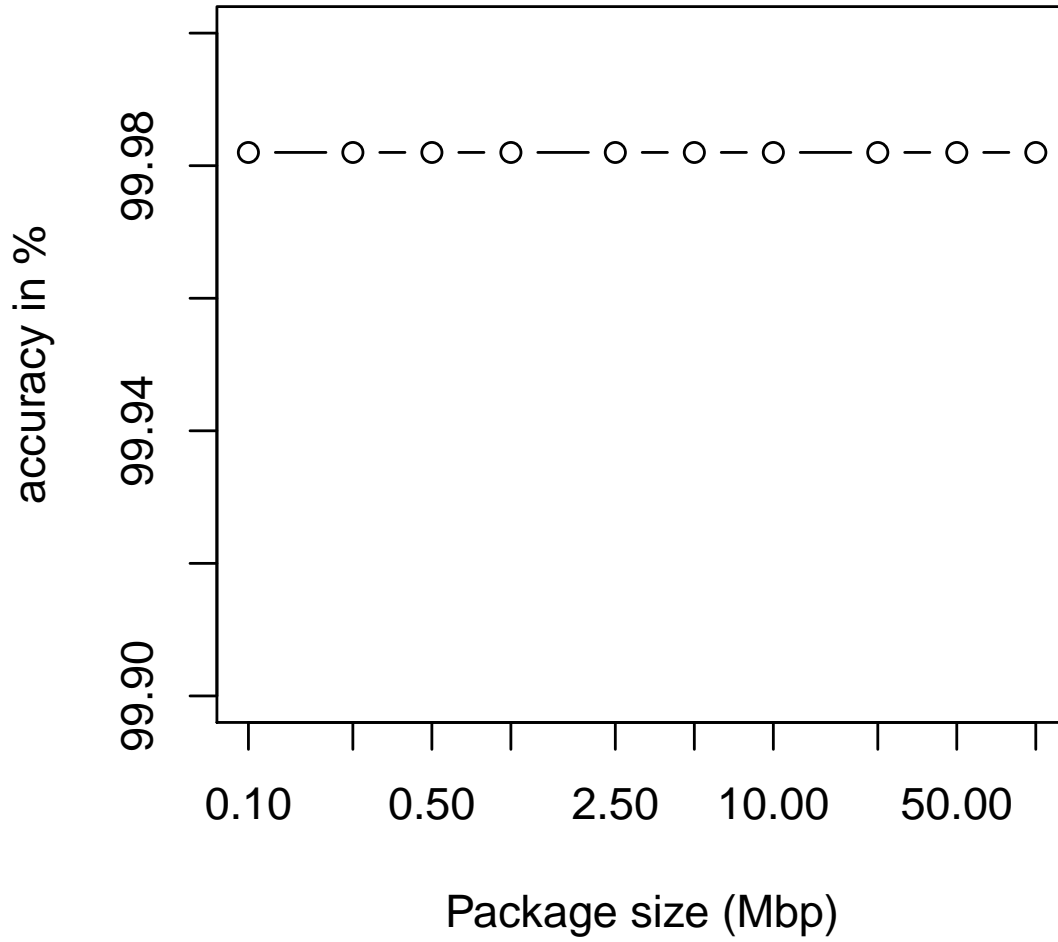

Fig. S1

## Package size vs. memory requirement

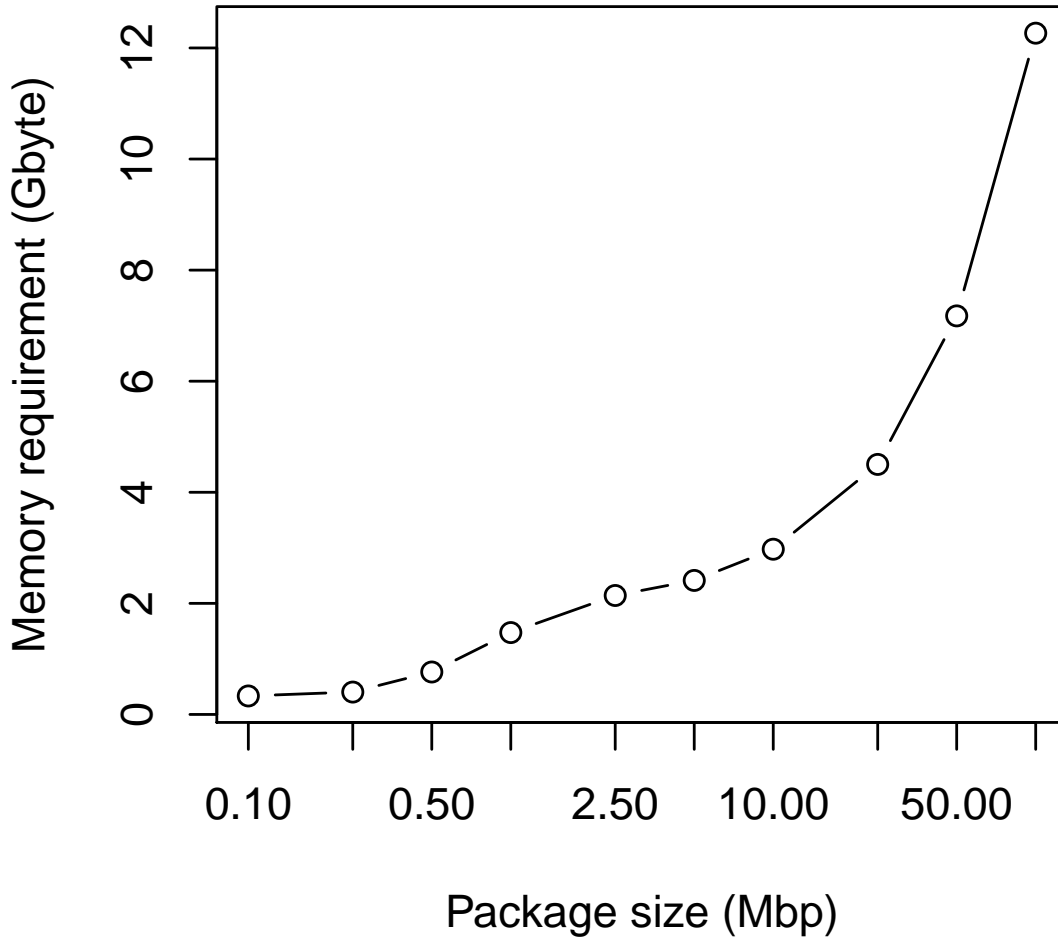

Fig. S2

## Expected coverage vs. correction accuracy

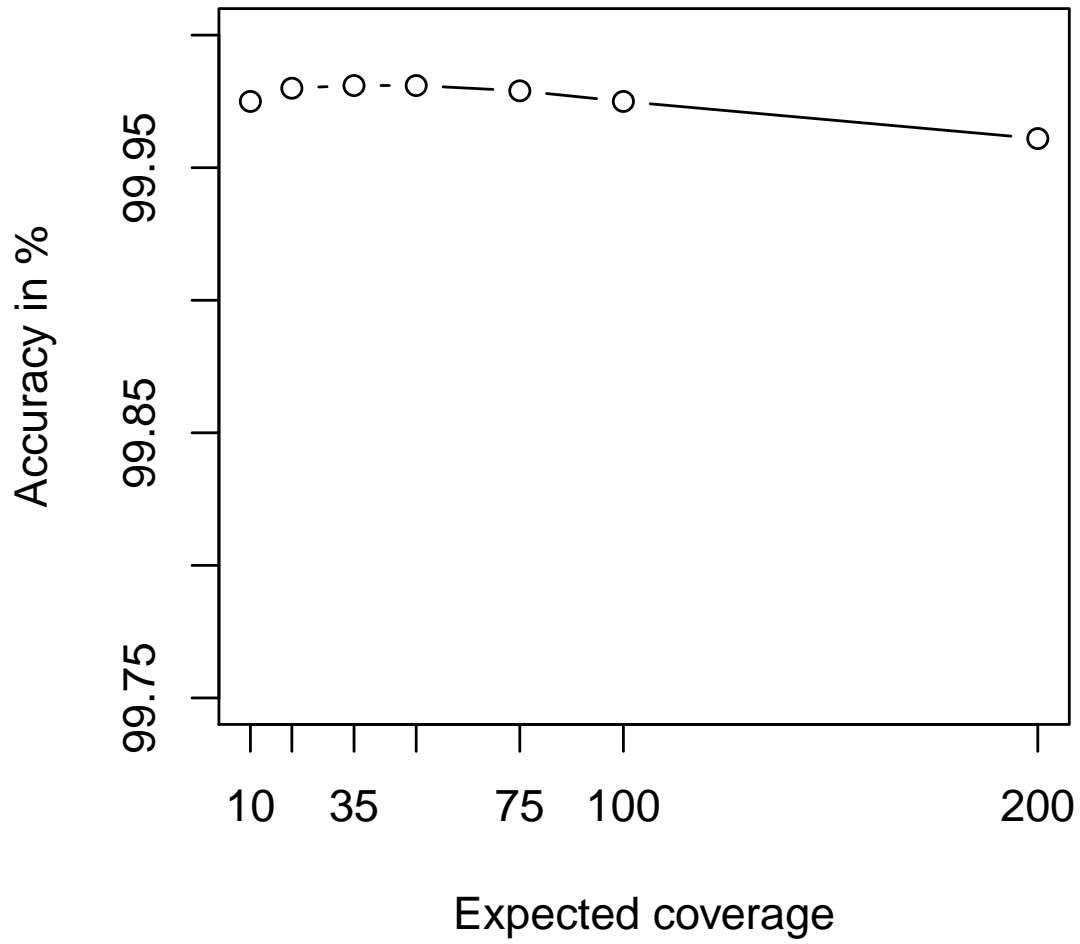

Fig. S3

# Expected coverage vs. correction throughput

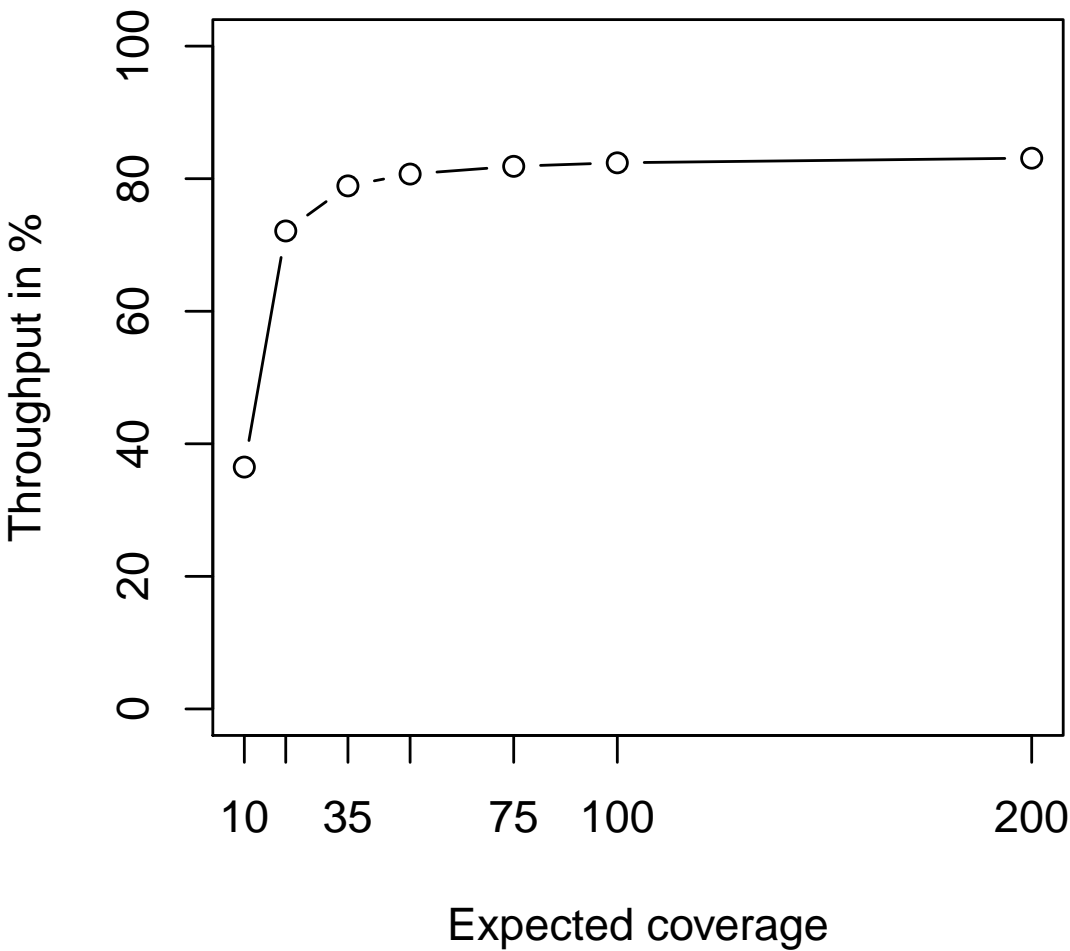

Fig. S4

# Expected coverage vs. memory consumption

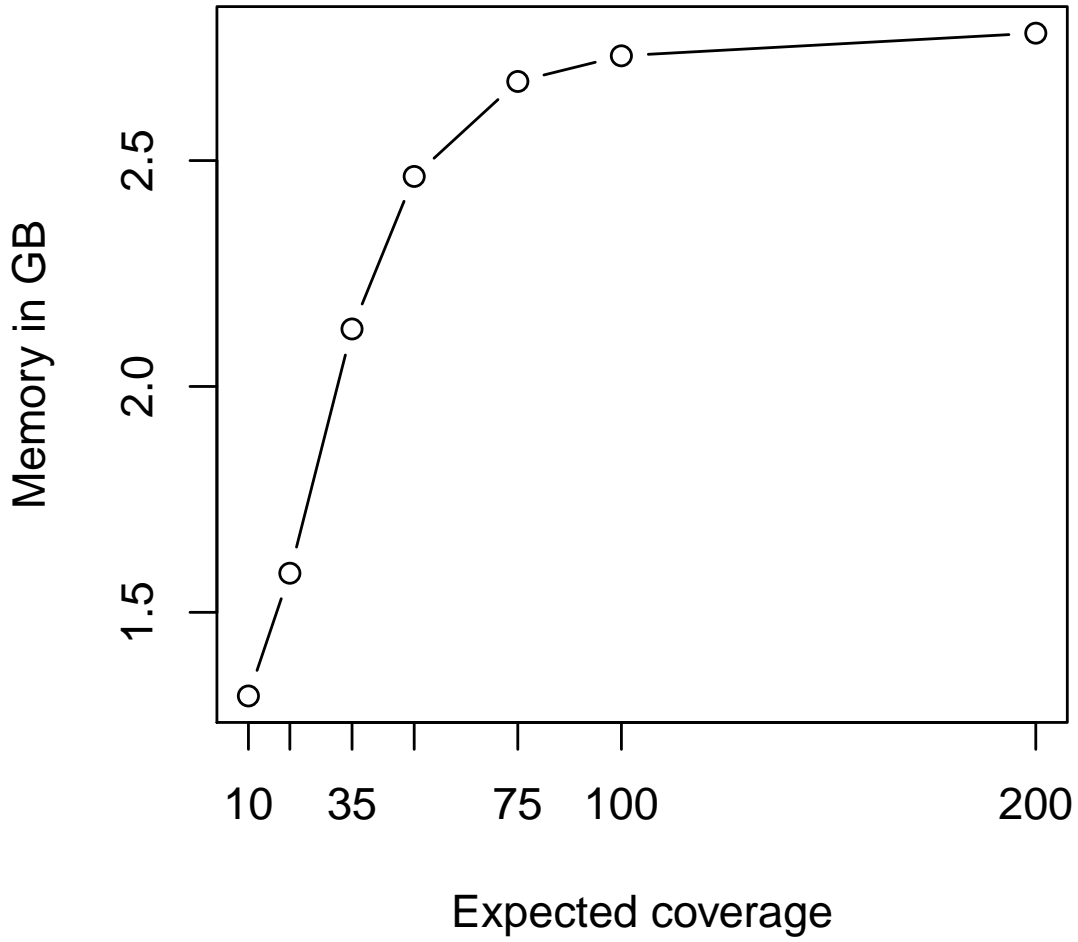

Fig. S5

**Table S3.** This table comprises the used data sets used for performance estimation of *proovread*.

| organism                | type           | genome reference | genome size | pacbio cell id / accession           | SR accession | read length |
|-------------------------|----------------|------------------|-------------|--------------------------------------|--------------|-------------|
| <i>Escherichia coli</i> | genomic        | GCA_000005845.1  | 4.64 Mbp    | c1002470425500000001523002504251220  | ERX002508    | 100 bp      |
|                         | genomic        | GCA_000001735.1  | 119.6 Mbp   | c10053946255000000018230896112411346 | SRX158552    | 110 bp      |
|                         | genomic        | GCA_000001405.12 | 3.23 Gbp    | c1005185419100000001823079209281310  | SRX246904    | 101 bp      |
| <i>Homo sapiens</i>     |                |                  |             |                                      | SRX246905    | 101 bp      |
|                         |                |                  |             |                                      | SRX246906    | 101 bp      |
|                         |                |                  |             |                                      | SRX246907    | 101 bp      |
|                         |                |                  |             |                                      | SRX247361    | 101 bp      |
|                         |                |                  |             |                                      | SRX247362    | 101 bp      |
| <i>Homo sapiens</i>     | transcriptomic | GCA_000001405.12 | 3.23 Gbp    | c100202382555000000315044810141103   | ERX011200    | 50 bp       |
|                         |                |                  |             | c100202382555000000315044810141104   | ERX011186    | 75 bp       |
|                         |                |                  |             | c100202382555000000315044810141105   |              |             |

**Table S4.** Percentage of ambiguous bases obtained from the corrections by *proovread*, PacBioToCA, and LSC

| Program                 | <i>Escherichia coli</i> | <i>Arabidopsis thaliana</i> | <i>Homo sapiens</i> |               |
|-------------------------|-------------------------|-----------------------------|---------------------|---------------|
|                         |                         |                             | genome              | transcriptome |
| <i>proovread</i> def.   | 0.54                    | 9.65                        | 3.40                | 0.27          |
| <i>proovread</i> norm.  |                         |                             | 1.49                |               |
| <i>proovread</i> adapt. |                         |                             |                     | 0.31          |
| PacBioToCA              | 1.37                    | 6.49                        |                     | 0.30          |
| LSC                     | 8.51                    | 16.88                       |                     | 1.65          |

## Bin size vs. maximum memory

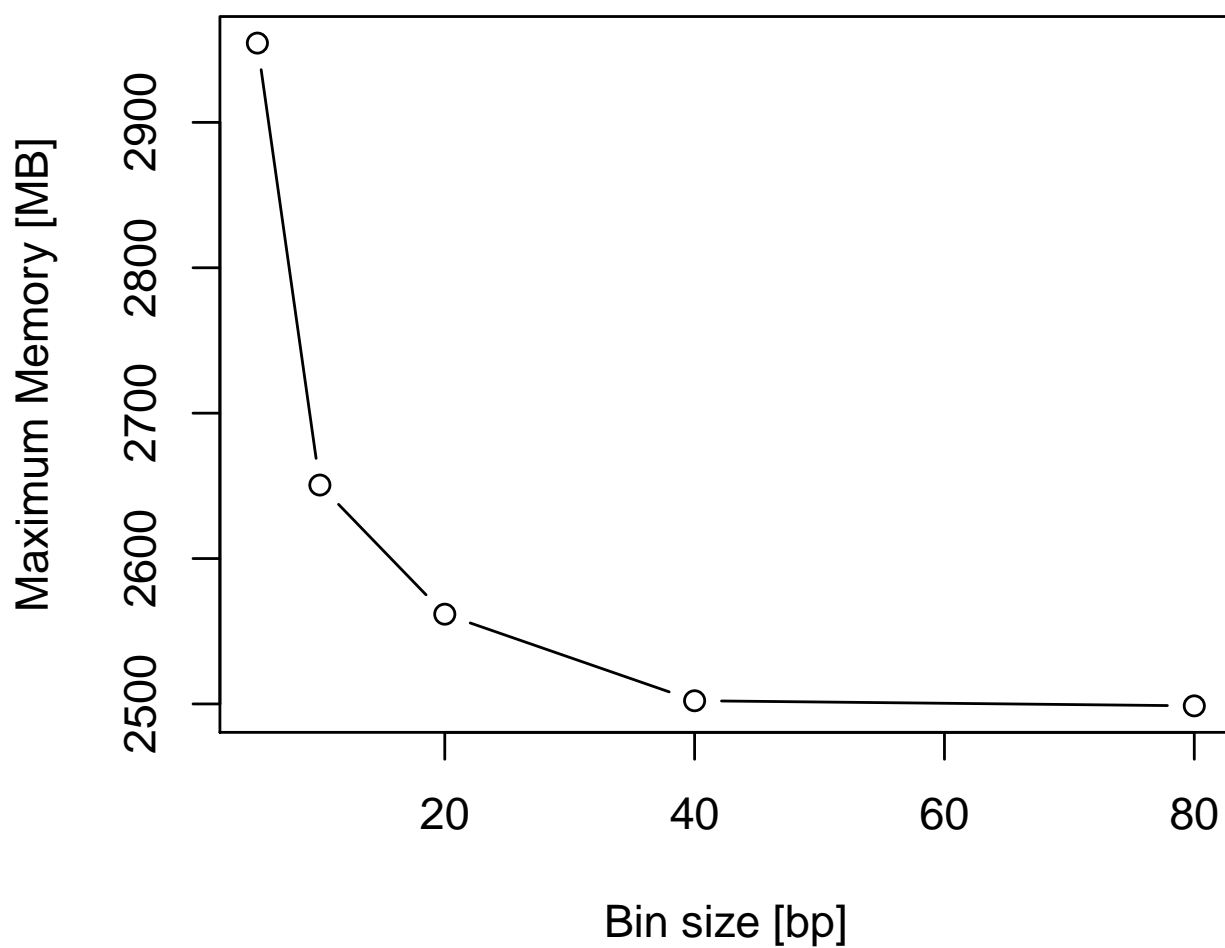

Fig. S6



## Bin size vs. accuracy

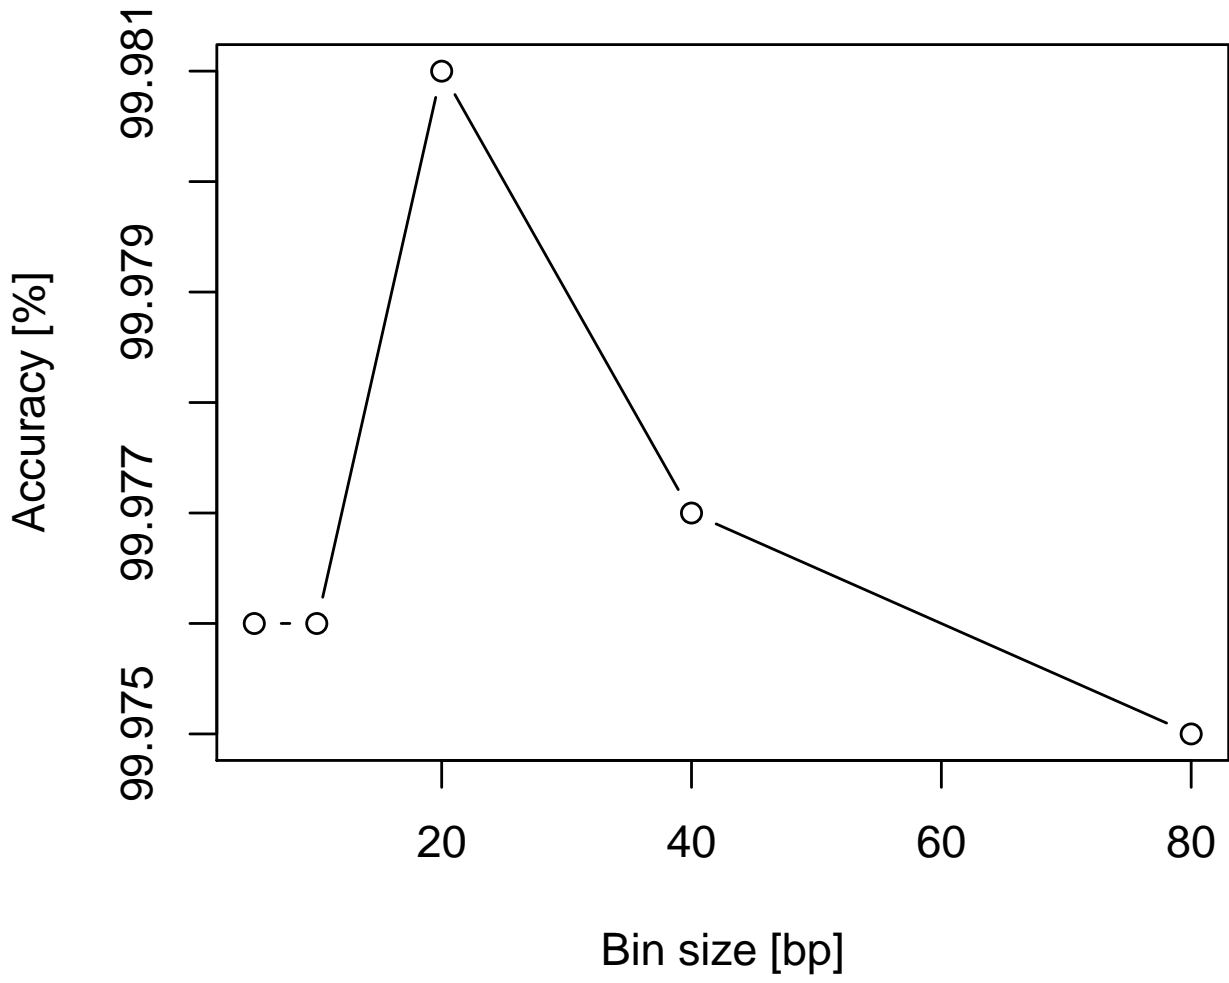

Fig. S7

## Bin size vs. throughput

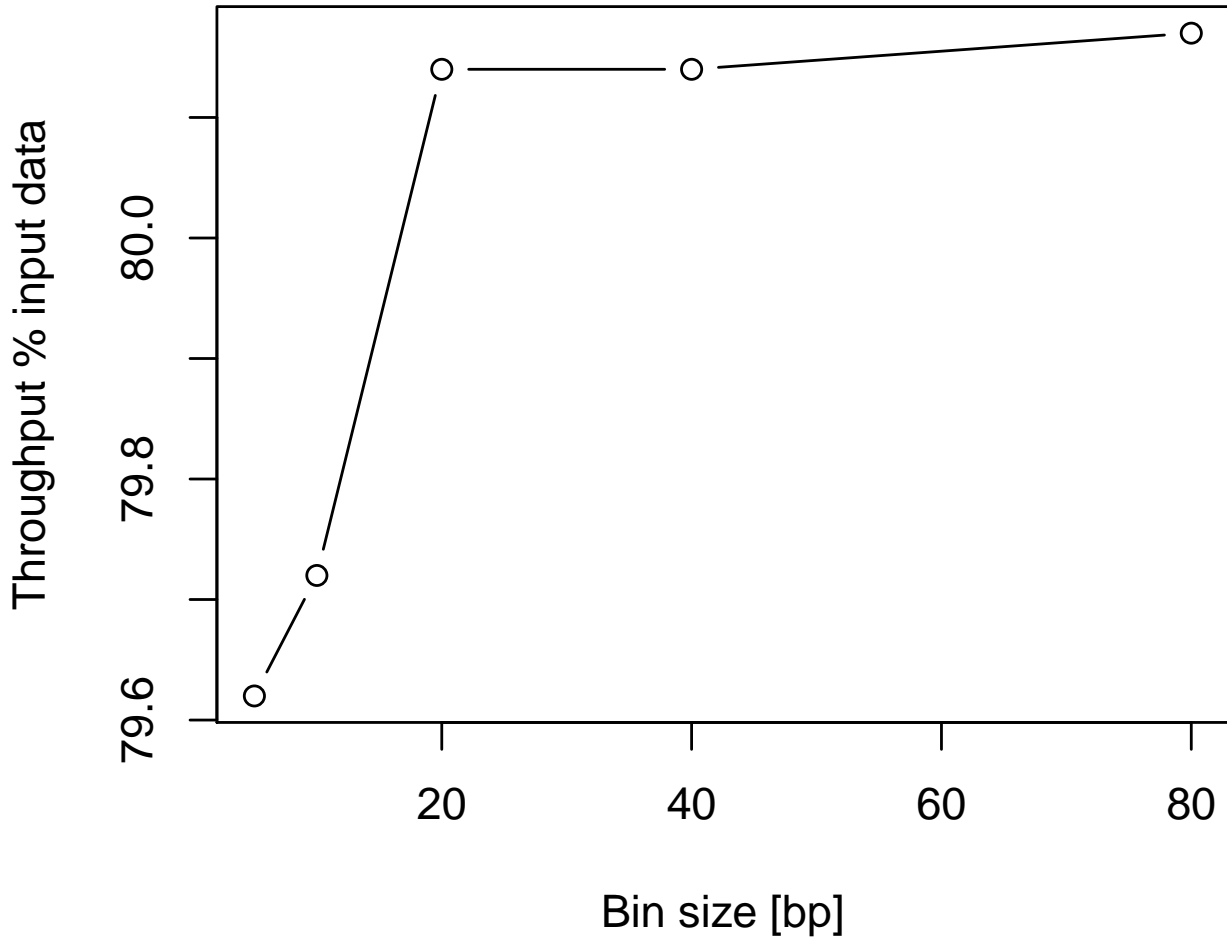

Fig. S8

## Coverage result (uncovered, 1–20x) E. coli

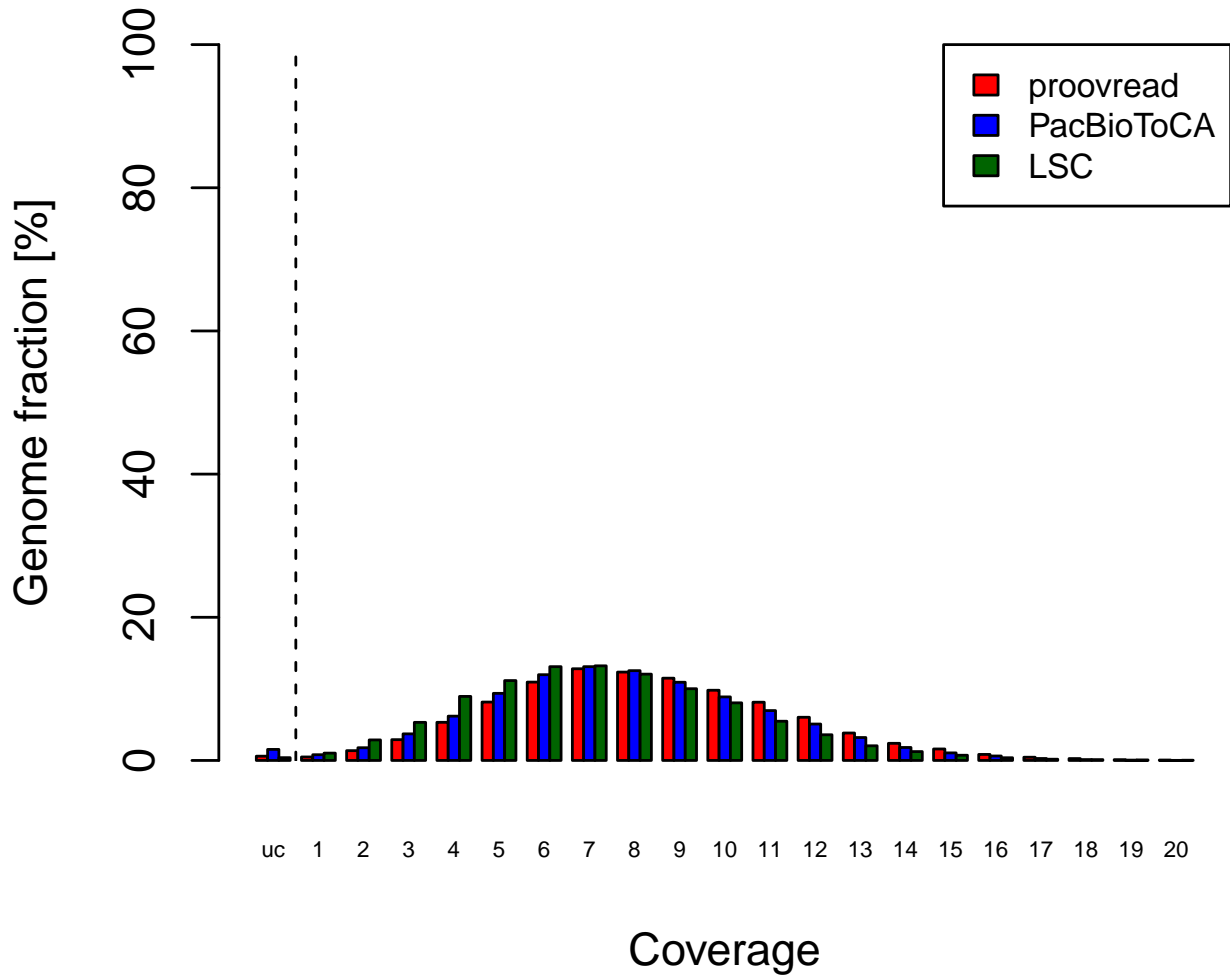

Fig. S9

## Coverage result (uncovered, 1–20x) *A. thaliana*

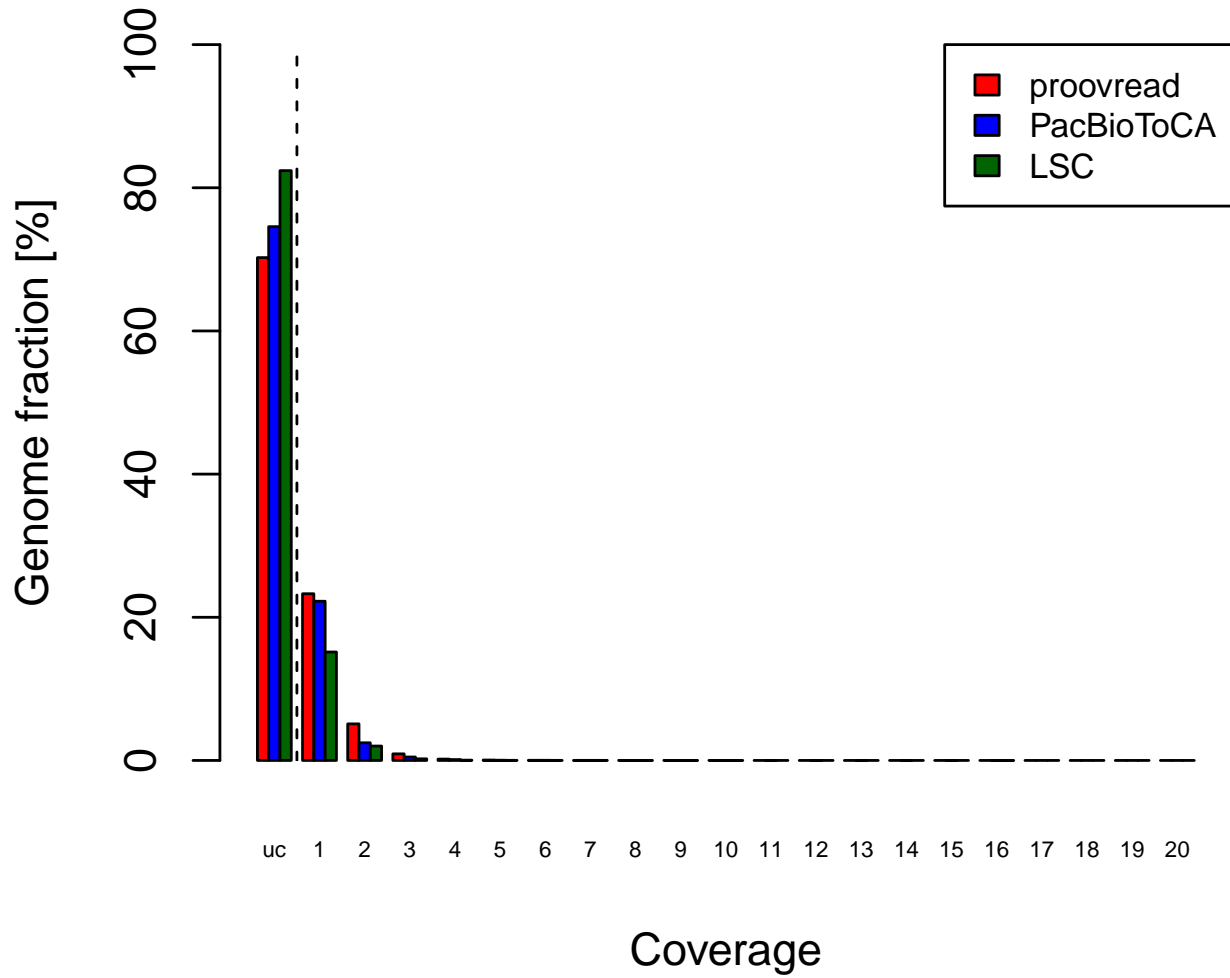

Fig. S10

# Coverage result (uncovered, 1–20x) H. sapiens

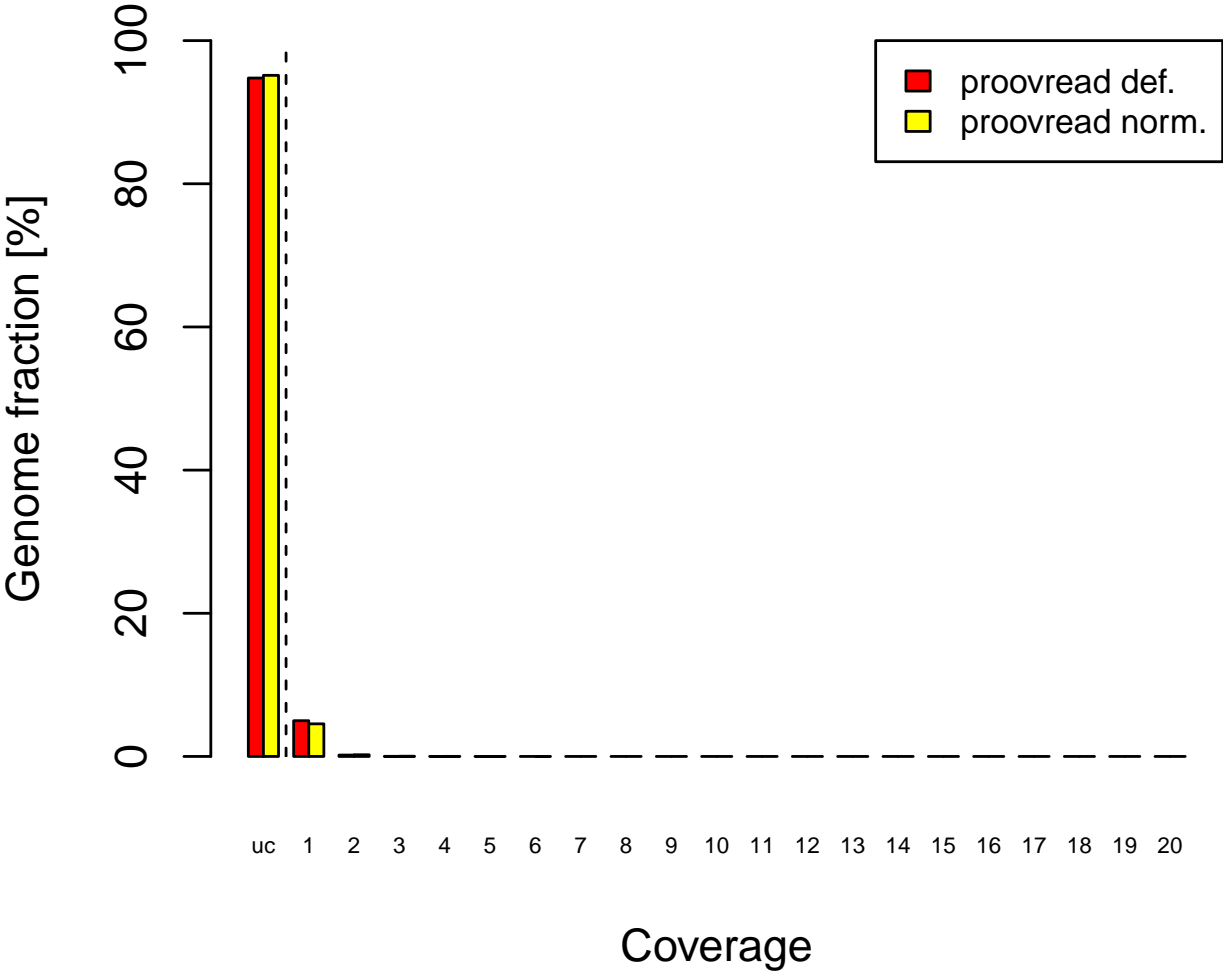

Fig. S11

**Table S5.** Overall horizontal coverage for the correction of genomic data sets of *Escherichia coli*, *Arabidopsis thaliana*, and *Homo sapiens*

| Method                   | <i>E. coli</i> | <i>A. thaliana</i> | <i>H. sapiens</i> |
|--------------------------|----------------|--------------------|-------------------|
| <i>proovread</i> default | 99.46 %        | 29.76 %            | 5.23 %            |
| <i>proovread</i> norm.   |                |                    | 4.85 %            |
| PacBioToCA               | 98.46 %        | 25.43 %            |                   |
| LSC                      | 99.62 %        | 17.60 %            |                   |

## proovread default config

```
## proovread Config File
##-- command line parameter -----##
## LIST of Pacbio read files to correct. FASTA or FASTQ format.
'long-reads' => [],
## LIST of high confidence short read files used for correction in FASTQ or
## FASTA format.
'short-reads' => [],
## Prefix to output files. Defaults to 'proovread'
'prefix' => undef,
## Coverage cutoff for highest scoring mappings at each location.
'coverage' => 40,
## Number of threads to use for mapping. Defaults to 8 (or maximum available
## number of processors, if less than 8 available).
'threads' => 4,
## to auto-detect max processors use:
## 'threads' => qx(grep 'processor' /proc/cpuinfo | wc -l) =" s/\n//r,
'mode' => undef, #'pacbio-pre', 'pacbio-iterative', 'pacbio-ccs', 'external-sam'
# for custom modes see mode_passes in the "advanced options" section
## Use already created mapping in SAM format to create corrected consensus
## sequences from. Use this as alternative input to --long-reads/short-reads
## If --sam is specified, --mode is automatically set to "external-sam".
'sam' => undef,
## By default, while mapping, a temporary SAM file is created and an index to
## this file is kept in memory. This limits the memory requirement for one SMRT
## cell (>100Mbp, 50X coverage) to less than 10Gb.
## Specify --ram-sam' to hold the SAM presentation entirely in memory. This is
## faster and saves disk space, but might require up to 100GB per SMRT cell.
'ram-sam' => undef,
## Sort the filtered SAM files by coordinates in addition to the
## sorting of references. This has no effect on the pipeline, and is just
## a convenience if you need the files for something else.
'sort-sam-by-coordinates' => undef,
## Specify '1' to keep temporary file of each pass, '2' to also keep the
## individual temporary file of each thread.
'keep-temporary-files' => 0, # 0,1,2
## overwrite exiting output folder
'overwrite' => 0,
##-- advanced parameter -----##
## don't mess with these unless you know what you are doing
## Short read quality offset, usually 64 or 33, use 0 for FASTA. Defaults to
## guessing, Specify value if guessing fails. Needs to be the same for all
## short read files provided.
'sr-qv-offset' => undef,
## Short read length. Defaults to guessing, sampling 1000 reads from input
## file. Specify value if guessing fails.
'sr-length' => undef,
## Number of short reads provided, used for ETA calculation. Defaults to
## guessing based on 1000 randomly sampled reads. Specify value if guessing
## fails.
'sr-count' => undef,
## Toggle short reads head/tail trimming including leading/trailing indels
## sr-indel-taboo-length
'sr-trim' => 1,
## Fraction of short reads used in pre masking steps
'sr-pre-fraction' => {
  'shrimp-pre-1' => 0.2,
  'shrimp-pre-2' => 0.3,
  'shrimp-pre-3' => 0.5,
  'shrimp-pre-4' => 0.3,
},
## expand lcr-min-length (min-sr-length + max-sr-dev) to this ratio.
'lcr-min-ratio' => 1.3,
##
'lcr-end-ratio' => {
  'shrimp-pre-1' => 0.8,
  'shrimp-pre-2' => 0.3,
  'shrimp-pre-3' => 0.5,
  'shrimp-pre-4' => 0.5,
},
## Trim reads to prevent insertions/deletions within the first
## 'sr-indel-taboo-length' fraction of the read. N=0 deactivates the feature.
'sr-indel-taboo' => 0.1,
## Long read qv-offset, required if --sam and --long are used together, and
## it cannot be detected automatically from --long file.
'lr-qv-offset' => undef,
## Detect and identify chimera like looking reads
'detect-chimera' => 1,
## Number of bases at the end of a hcr from the previous iteration not be
## masked w/r/t sr-length
'hcr-sticky-ratio' => .3,
## Minimum length of a hcr region to be considered as such w/r/t sr-length,
## 0 deactivates hcr detection.
'hcr-min-ratio' => .8,
## Number of reads to check out at once for individual consensus correction
## process. Memory intensive step, be cautious with great values
'chunk-size' => 100,
## Size in base pairs of bins for local score comparisons
'bin-size' => 20,
##-- task settings -----##
'mode-tasks' => {
```

```
# illumina, evenly covered, e.g. genome
'pacbio-pre' => ['read-long', 'shrimp-pre-1', 'shrimp-pre-2',
               'shrimp-pre-3', 'shrimp-finish'],
# use an externally created SAM file
'external-sam' => ['read-long', 'read-sam'],
# illumina, unevenly covered, e.g. quant. RNA-seq, slower than pacbio-pre
'pacbio-iterative' => ['read-long', 'shrimp-iter-1', 'shrimp-iter-2',
                    'shrimp-finish'],
# Experimental: illumina, bowtie2 + shrimp
'bowtie2' => ['read-long', 'bowtie2-iter-1', 'shrimp-pre-2',
            'bowtie2-finish'],
# Experimental: Circular Consensus, 454...
'pacbio-ccs' => ['read-long', 'shrimp-ccs', 'shrimp-finish'],
# custom => ['my-pass-settings, finish], #...
),
## shrimp-pre-1
'shrimp-pre-1' => {
  '-h' => "55%",
  '--report' => 200,
  '-s' => "1"x11,
  '-w' => "130%",
  '--no-mapping-qualities' => '',
  '--match' => 5,
  '--mismatch' => -11,
  '--open-r' => -2,
  '--open-q' => -1,
  '--ext-r' => -4,
  '--ext-q' => -3,
},
## shrimp-pre-2
'shrimp-pre-2' => {
  '-h' => "55%",
  '--report' => 200,
  '-s' => "1"x10,
  '-w' => "140%",
  '-x' => "45%",
  '--no-mapping-qualities' => '',
  '--match' => 5,
  '--mismatch' => -11,
  '--open-r' => -2,
  '--open-q' => -1,
  '--ext-r' => -4,
  '--ext-q' => -3,
},
## shrimp-pre-3
'shrimp-pre-3' => {
  '-h' => "50%",
  '--report' => 200,
  '-s' => "11111111,1111110000111111",
  '-w' => "140%",
  '-x' => "35%",
  '--no-mapping-qualities' => '',
  '--match' => 5,
  '--mismatch' => -11,
  '--open-r' => -2,
  '--open-q' => -1,
  '--ext-r' => -4,
  '--ext-q' => -3,
},
## shrimp finish
'shrimp-finish' => {
  '-h' => "90%",
  '--report' => 200,
  '-s' => "1"x20,
  '--hash-spaced-kmers' => '',
  '--match' => 5,
  '--mismatch' => -10,
  '--open-r' => -5,
  '--open-q' => -5,
  '--ext-r' => -2,
  '--ext-q' => -2,
},
##-- Chimera filter -----##
'chimera-filter' => {
  '--min-score' => 0.01,
  '--trim-length' => 20,
  '--verbose' => 2
},
##-- SeqFilter settings -----##
'seq-filter' => {
  '--trim-win' => 15,
  '--trim-lcs' => '3,50,100',
  '--min-length' => 100,
},
##-- SeqChunker settings -----##
'seq-chunker' => {
  '--chunk-number' => 100,
},
),
```

## proovread transcriptome config

```
## proovread Config File
##-- command line parameter -----##
## LIST of Pacbio read files to correct. FASTA or FASTQ format.
'long-reads' => [],
## LIST of high confidence short read files used for correction in FASTQ or
## FASTA format.
'short-reads' => [],
## Prefix to output files. Defaults to 'proovread'
'prefix' => undef,
## Coverage cutoff for highest scoring mappings at each location.
'coverage' => 40,
## Number of threads to use for mapping. Defaults to 8 (or maximum available
## number of processors, if less than 8 available).
'threads' => 4,
## to auto-detect max processors use:
## 'threads' => qx(grep 'processor' /proc/cpuinfo | wc -l) =~ s/\n//r,
'mode' => undef, #'pacbio-pre', 'pacbio-iterative', 'pacbio-ccs', 'external-sam'
# for custom modes see mode_passes in the "advanced options" section
## Use already created mapping in SAM format to create corrected consensus
## sequences from. Use this as alternative input to --long-reads/short-reads
## If --sam is specified, --mode is automatically set to "external-sam".
'sam' => undef,
## By default, while mapping, a temporary SAM file is created and an index to
## this file is kept in memory. This limits the memory requirement for one SMRT
## cell (>100Mbp, 50X coverage) to less than 10Gb.
## Specify '--ram-sam' to hold the SAM presentation entirely in memory. This is
## faster and saves disk space, but might require up to 100GB per SMRT cell.
'ram-sam' => undef,
## Sort the filtered SAM files by coordinates in addition to the
## sorting of references. This has no effect on the pipeline, and is just
## a convenience if you need the files for something else.
'sort-sam-by-coordinates' => undef,
## Specify '1' to keep temporary file of each pass, '2' to also keep the
## individual temporary file of each thread.
'keep-temporary-files' => 0, # 0,1,2
## overwrite exiting output folder
'overwrite' => 0,
##-- advanced parameter -----##
## don't mess with these unless you know what you are doing
## Short read quality offset, usually 64 or 33, use 0 for FASTA. Defaults to
## guessing, Specify value if guessing fails. Needs to be the same for all
## short read files provided.
'sr-qv-offset' => undef,
## Short read length. Defaults to guessing, sampling 1000 reads from input
## file. Specify value if guessing fails.
'sr-length' => undef,
## Number of short reads provided, used for ETA calculation. Defaults to
## guessing based on 1000 randomly sampled reads. Specify value if guessing
## fails.
'sr-count' => undef,
## Toggle short reads head/tail trimming including leading/trailing indels
## sr-indel-taboo-length
'sr-trim' => 1,
## Fraction of short reads used in pre masking steps
'sr-pre-fraction' => {
  'shrimp-pre-1' => 0.5,
  'shrimp-pre-2' => 1.0,
  'shrimp-pre-3' => 1.0,
  'shrimp-pre-4' => 1.0,
},
## expand lcr-min-length (min-sr-length + max-sr-dev) to this ratio.
'lcr-min-ratio' => 1.3,
##
'lcr-end-ratio' => {
  'shrimp-pre-1' => 0.8,
  'shrimp-pre-2' => 0.3,
  'shrimp-pre-3' => 0.5,
  'shrimp-pre-4' => 0.5,
},
## Trim reads to prevent insertions/deletions within the first
## 'sr-indel-taboo-length' fraction of the read. N=0 deactivates the feature.
'sr-indel-taboo' => 0.1,
## Long read qv-offset, required if --sam and --long are used together, and
## it cannot be detected automatically from --long file.
'lr-qv-offset' => undef,
## Detect and identify chimera like looking reads
'detect-chimera' => 1,
## Number of bases at the end of a hcr from the previous iteration not be
## masked w/r/t sr-length
'hcr-sticky-ratio' => .3,
## Minimum length of a hcr region to be considered as such w/r/t sr-length,
## 0 deactivates hcr detection.
'hcr-min-ratio' => .8,
## Number of reads to check out at once for individual consensus correction
## process. Memory intensive step, be cautious with great values
'chunk-size' => 100,
## Size in base pairs of bins for local score comparisons
'bin-size' => 20,
##-- task settings -----##
```

```
'mode-tasks' => {
  # illumina, evenly covered, e.g. genome
  'pacbio-pre' => ['read-long', 'shrimp-pre-1', 'shrimp-pre-2',
                 'shrimp-pre-3', 'shrimp-finish'],
  # use an externally created SAM file
  'external-sam' => ['read-long', 'read-sam'],
  # illumina, unevenly covered, e.g. quant. RNA-seq, slower than pacbio-pre
  'pacbio-iterative' => ['read-long', 'shrimp-iter-1', 'shrimp-iter-2',
                       'shrimp-finish'],
  # Experimental: illumina, bowtie2 + shrimp
  'bowtie2' => ['read-long', 'bowtie2-iter-1', 'shrimp-pre-2',
              'bowtie2-finish'],
  # Experimental: Circular Consensus, 454...
  'pacbio-ccs' => ['read-long', 'shrimp-ccs', 'shrimp-finish'],
  # custom => ['my-pass-settings', finish], #...
},
## shrimp-pre-1
'shrimp-pre-1' => {
  '-h' => "55%",
  '--report' => 200,
  '-s' => "1"x11,
  '-w' => "130%",
  '--no-mapping-qualities' => '',
  '--match' => 5,
  '--mismatch' => -11,
  '--open-r' => -2,
  '--open-q' => -1,
  '--ext-r' => -4,
  '--ext-q' => -3,
},
## shrimp-pre-2
'shrimp-pre-2' => {
  '-h' => "55%",
  '--report' => 200,
  '-s' => "1"x10,
  '-w' => "140%",
  '-r' => "45%",
  '--no-mapping-qualities' => '',
  '--match' => 5,
  '--mismatch' => -11,
  '--open-r' => -2,
  '--open-q' => -1,
  '--ext-r' => -4,
  '--ext-q' => -3,
},
## shrimp-pre-3
'shrimp-pre-3' => {
  '-h' => "50%",
  '--report' => 200,
  '-s' => "11111111,1111110000111111",
  '-w' => "140%",
  '-r' => "35%",
  '--no-mapping-qualities' => '',
  '--match' => 5,
  '--mismatch' => -11,
  '--open-r' => -2,
  '--open-q' => -1,
  '--ext-r' => -4,
  '--ext-q' => -3,
},
## shrimp finish
'shrimp-finish' => {
  '-h' => "90%",
  '--report' => 200,
  '-s' => "1"x20,
  '--hash-spaced-kmers' => '',
  '--match' => 5,
  '--mismatch' => -10,
  '--open-r' => -5,
  '--open-q' => -5,
  '--ext-r' => -2,
  '--ext-q' => -2,
},
##-- Chimera filter -----##
'chimera-filter' => {
  '--min-score' => 0.01,
  '--trim-length' => 20,
  '--verbose' => 2
},
##-- SeqFilter settings -----##
'seq-filter' => {
  '--trim-win' => 20,
  '--trim-lcs' => '3,50,100',
  '--min-length' => 100,
},
##-- SeqChunker settings -----##
'seq-chunker' => {
  '--chunk-number' => 100,
},
}
```
